# Supplementary material for: Metabolic Response of Escherichia coli upon Treatment with Hypochlorite at Sub-Lethal Concentrations
Source: PubMed Central journal article supplement (PMC4416902; doi:10.1371/journal.pone.0125823), 2015-05-01
Supplement: pone.0125823.s005.pdf [file pone.0125823.s005.pdf]

S3 Table. Peaks originating from unidentified compounds and not illustrated and/or discussed in the main text (Fig. 4-6).

| Ret. Time | control   |           | 20 min HOCl |          | 40 min HOCl |          | 60 min HOCl |          |
|-----------|-----------|-----------|-------------|----------|-------------|----------|-------------|----------|
|           | mean      | SD        | mean        | SD       | mean        | SD       | mean        | SD       |
| 7,56      | 192859,58 | 103600,91 | 133797,04   | 85267,74 | 42126,54    | 11145,50 | 43540,35    | 9994,87  |
| 7,66      | 3400,12   | 59,04     | 3529,40     | 123,49   | 3028,70     | 284,59   | 2887,04     | 132,80   |
| 11,96     | 21578,21  | 16410,22  | 17220,74    | 9073,92  | 13227,15    | 3817,84  | 22840,80    | 18461,80 |
| 12,03     | 4128,25   | 1213,09   | 3736,10     | 433,31   | 3533,97     | 413,68   | 2907,88     | 470,42   |
| 13,13     | 3662,94   | 1041,95   | 3708,63     | 1484,48  | 4738,27     | 2862,76  | 14230,35    | 18972,52 |
| 14,12     | 6205,08   | 2616,96   | 5022,88     | 986,73   | 5579,45     | 231,74   | 6277,47     | 1410,49  |
| 16,00     | 152223,18 | 1632,51   | 172938,46   | 14689,51 | 178442,79   | 13256,80 | 146962,42   | 38270,33 |
| 16,25     | 1802,67   | 777,83    | 1031,68     | 59,51    | 799,97      | 65,16    | 516,02      | 194,81   |
| 18,53     | 1707,98   | 480,09    | 3619,89     | 1551,93  | 7159,42     | 4582,55  | 7158,83     | 5332,18  |
| 18,73     | 908,32    | 41,43     | 992,16      | 197,16   | 892,20      | 74,80    | 877,65      | 163,55   |
| 21,50     | 4395,24   | 1732,59   | 3027,86     | 1072,11  | 3014,65     | 970,97   | 3488,74     | 1266,08  |
| 21,87     | 1356,40   | 297,94    | 2023,93     | 336,46   | 2465,52     | 632,39   | 2520,15     | 890,19   |
| 22,15     | 2175,92   | 814,28    | 1368,12     | 318,18   | 866,92      | 474,77   | 833,67      | 168,73   |
| 22,36     | 2035,90   | 84,79     | 2932,22     | 415,61   | 3562,16     | 440,17   | 3558,81     | 655,75   |
| 22,83     | 5426,46   | 2079,11   | 6395,77     | 1016,38  | 5339,83     | 48,40    | 5671,54     | 1560,15  |
| 23,11     | 2305,93   | 855,22    | 1135,90     | 851,78   | 709,90      | 182,00   | 720,96      | 332,77   |
| 23,45     | 5924,96   | 151,88    | 2027,95     | 890,75   | 1406,99     | 303,43   | 1736,35     | 307,78   |
| 23,77     | 25054,44  | 4462,99   | 36291,41    | 5140,88  | 26030,47    | 805,03   | 36451,45    | 21421,82 |
| 25,43     | 88973,20  | 30636,23  | 73515,89    | 11073,19 | 67122,91    | 6035,86  | 66698,05    | 14815,30 |
| 25,56     | 8065,07   | 417,93    | 11241,18    | 913,68   | 14076,44    | 2330,85  | 11753,94    | 2746,10  |
| 26,25     | 1177,04   | 601,60    | 1019,44     | 327,73   | 1109,03     | 232,30   | 1086,84     | 255,73   |
| 26,45     | 5619,66   | 1037,09   | 7033,55     | 1022,33  | 5495,42     | 1898,03  | 4923,13     | 2572,33  |
| 26,81     | 23117,12  | 3309,51   | 5459,27     | 579,17   | 2273,49     | 388,16   | 1259,93     | 234,39   |
| 27,23     | 2942,92   | 547,38    | 764,66      | 204,01   | 2047,73     | 589,27   | 2092,26     | 450,01   |

|       |          |          |          |          |          |          |          |          |
|-------|----------|----------|----------|----------|----------|----------|----------|----------|
| 27,60 | 1569,10  | 127,78   | 1580,09  | 831,58   | 622,81   | 111,87   | 499,18   | 249,26   |
| 27,66 | 2375,54  | 454,24   | 2621,25  | 1097,40  | 2568,60  | 247,64   | 2307,97  | 253,07   |
| 27,89 | 3300,27  | 1497,26  | 2092,49  | 264,25   | 1501,88  | 389,54   | 472,37   | 151,77   |
| 27,97 | 1446,75  | 393,14   | 1429,15  | 351,40   | 1270,71  | 234,04   | 1645,19  | 554,48   |
| 28,06 | 974,14   | 517,40   | 765,88   | 80,04    | 988,68   | 127,79   | 1084,78  | 327,22   |
| 28,66 | 1505,12  | 531,97   | 1037,81  | 167,66   | 1437,67  | 108,21   | 3608,14  | 3130,11  |
| 28,77 | 36248,17 | 8108,50  | 26823,28 | 4354,41  | 33707,18 | 3805,79  | 30659,83 | 6437,91  |
| 29,42 | 44822,34 | 24724,09 | 17698,27 | 1209,96  | 34170,08 | 1599,56  | 32734,59 | 7259,01  |
| 29,73 | 11718,56 | 9746,10  | 2071,42  | 527,11   | 5542,08  | 1315,29  | 7047,14  | 2369,00  |
| 29,98 | 884,51   | 137,51   | 477,34   | 313,79   | 2805,85  | 1315,11  | 1292,16  | 1031,34  |
| 30,14 | 2768,01  | 1336,35  | 811,36   | 209,53   | 1014,25  | 90,48    | 390,56   | 348,42   |
| 30,69 | 8542,20  | 598,29   | 8356,15  | 625,11   | 9622,17  | 760,47   | 10173,24 | 2123,40  |
| 30,79 | 5931,02  | 114,69   | 3519,70  | 974,30   | 1958,44  | 185,52   | 1657,07  | 945,61   |
| 31,75 | 1998,28  | 961,17   | 2894,65  | 865,68   | 2780,89  | 732,01   | 2216,62  | 1119,36  |
| 31,84 | 1982,54  | 199,71   | 2548,57  | 593,47   | 1726,91  | 229,16   | 1013,91  | 511,85   |
| 31,99 | 1193,00  | 453,28   | 869,93   | 414,00   | 698,20   | 301,67   | 416,53   | 143,20   |
| 32,15 | 24460,09 | 6705,06  | 26484,53 | 6853,64  | 35537,34 | 9119,14  | 35271,80 | 5415,69  |
| 32,38 | 46427,87 | 12603,97 | 70549,17 | 52104,25 | 28571,86 | 13334,55 | 12896,14 | 5346,27  |
| 32,73 | 6100,81  | 2259,30  | 8261,71  | 5869,70  | 3311,73  | 1963,28  | 2013,63  | 427,40   |
| 34,42 | 5143,47  | 897,03   | 3034,82  | 915,68   | 1925,10  | 249,25   | 2137,04  | 397,17   |
| 35,24 | 1292,85  | --       | 1305,07  | 542,36   | 1217,35  | 245,30   | 1817,10  | 1222,74  |
| 36,27 | 21738,69 | 13299,37 | 38353,05 | 5661,84  | 30214,30 | 19095,69 | 41199,11 | 5668,61  |
| 37,15 | 1320,93  | 647,80   | 875,53   | 274,85   | 702,53   | 422,90   | 833,71   | 157,48   |
| 37,78 | 36799,71 | 2936,24  | 39074,94 | 3376,05  | 40520,99 | 4810,69  | 46901,49 | 11736,95 |
| 39,50 | 8013,73  | 5277,45  | 11996,25 | 2239,13  | 11109,09 | 942,88   | 11664,08 | 5189,10  |
| 41,94 | 3377,08  | 1331,93  | 4285,26  | 2216,27  | 3432,15  | 493,25   | 3517,61  | 1058,85  |

Shown are the retention times of peaks listed in Table S2, but not shown in Figures 4-6 of the main text, and their mean concentrations  $\pm$  SD before stress and after 20 min, 40 min and 60 min HOCl exposure ( $n \geq 3$ ).
